# Supplementary material
Source: PubMed Central journal article supplement (PMC3171997)
Supplement: ct200162x_si_001.pdf [file ct200162x_si_001.pdf]

## **Supporting Information**

### **Refinement of the Cornell *et al.* Nucleic Acids Force Field based on Reference Quantum Chemical Calculations of Glycosidic Torsion Profiles**

Marie Zgarbová, Michal Otyepka, Jiří Šponer, Arnošt Mládek, Pavel Banáš, Thomas E.  
Cheatham, III, and Petr Jurečka

**Figure S1.**  $\chi$  torsion profile for rX (full line) and dX (dotted line). The typical average X-ray values for A-RNA, B-DNA and Z-DNA are marked. PBE/LP data with inclusion of solvent effects.

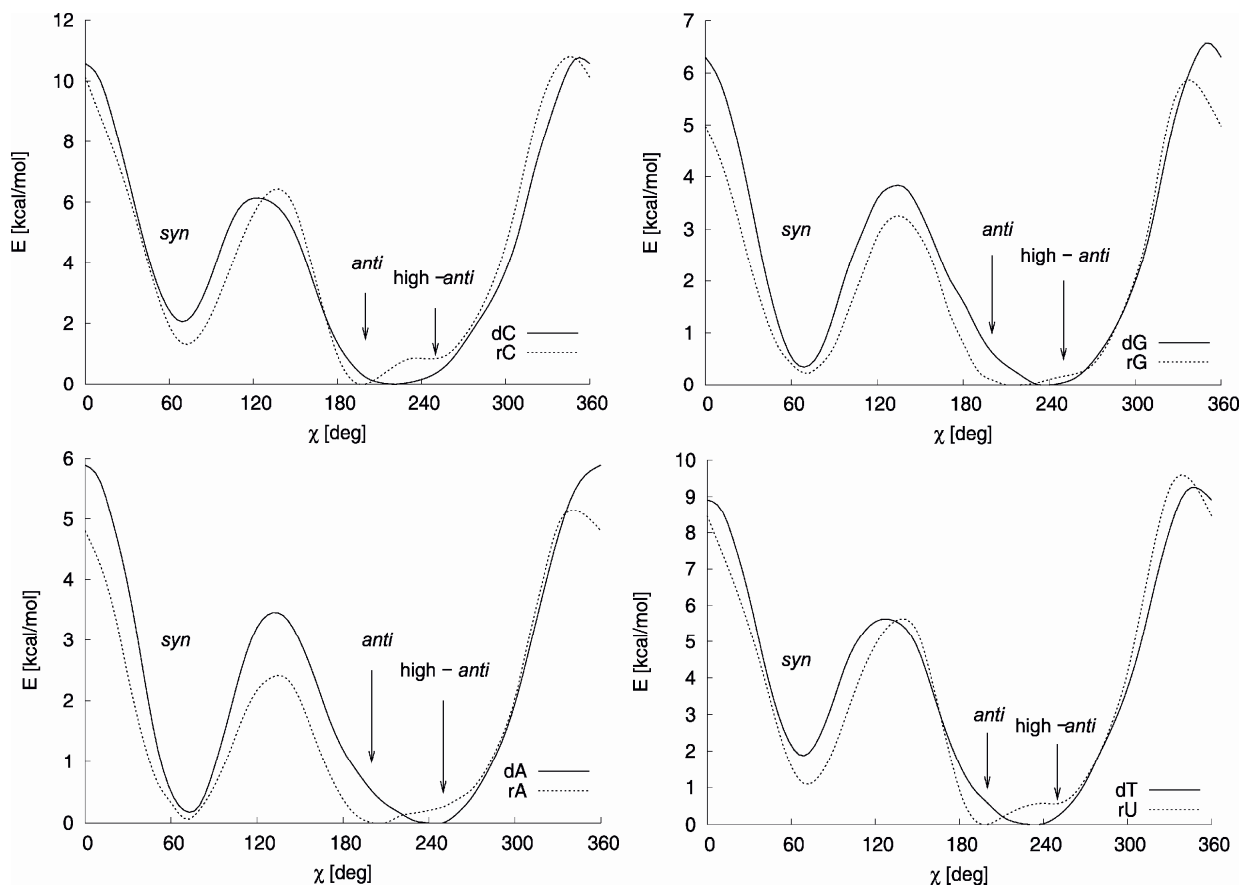

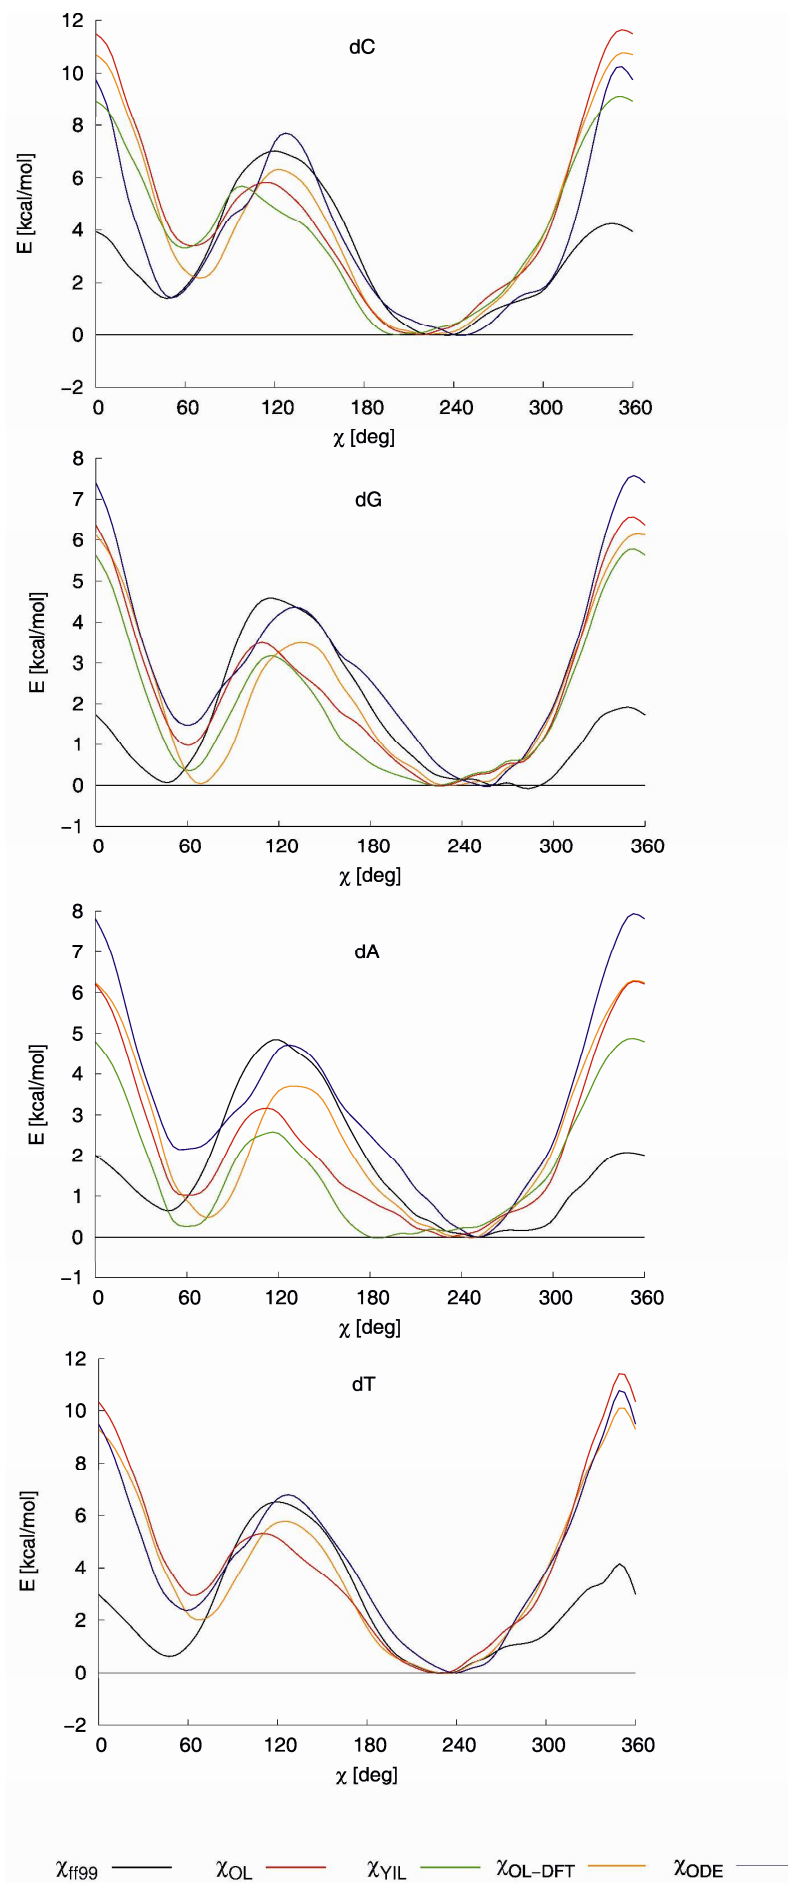

**Figure S2.** Torsion profiles in solvent (full force field energies) for  $\chi$  angle for ff99 (black), Ode *et al.* (blue), Yildirim *et al.* (green) and parameters derived herein ( $\chi_{\text{OL-DFT}}$  orange,  $\chi_{\text{OL}}$  red) for deoxyribonucleosides. Compare this figure with Fig. 6 in the article.

**Figure S3.** QM torsion profiles calculated in vacuum and with COSMO solvent model (PBE/LP-1.06-23), MM torsion profiles in vacuum and with PB solvent model and the  $\chi$  dihedral term contribution to the torsion derived from the continuum solvent data of 2-deoxyribonucleoside with C2'-endo (full line) and C3'-endo (dotted line) sugar pucker and ribonucleoside with C3'-endo sugar pucker (dashed line). All data are given in one high-resolution picture which can be enlarged to simplify comparison.

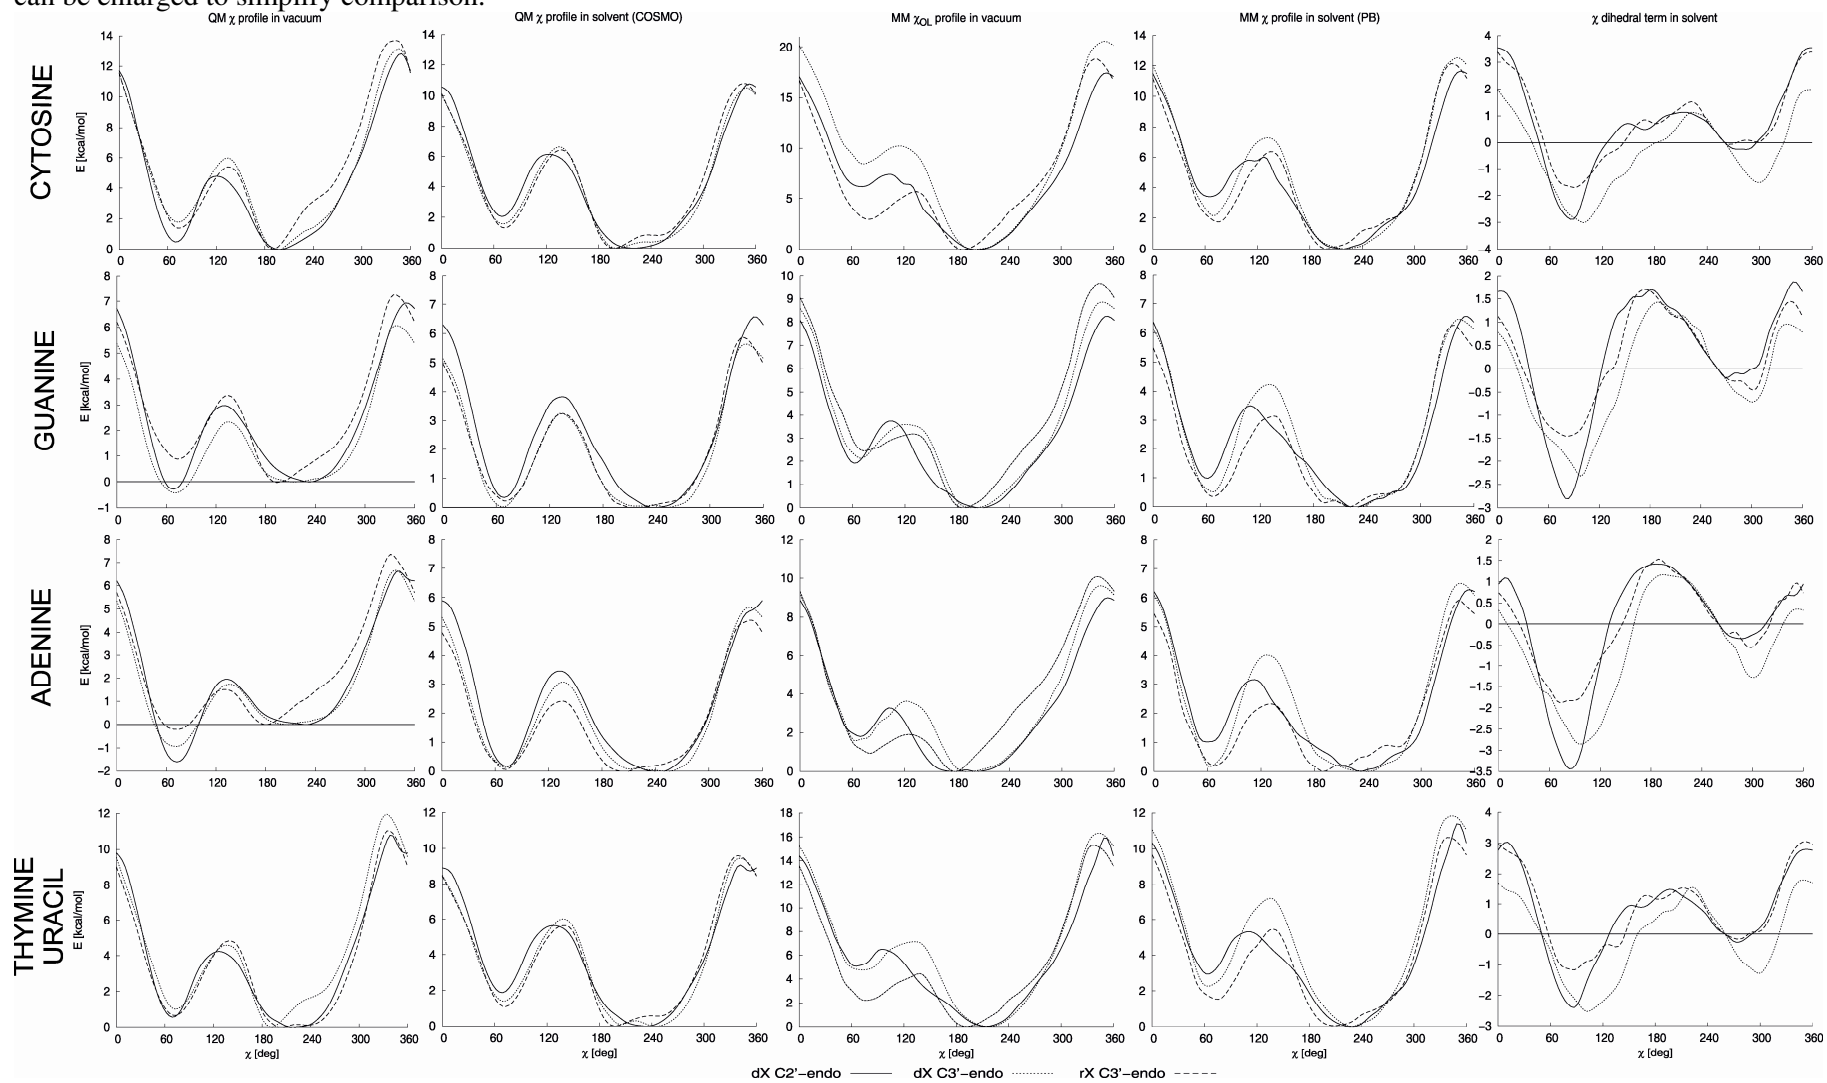

**Table S1.** The dihedral parameters for  $\chi_{\text{OL-DFT}}$  parameterization. CJ is a new atom type introduced to distinguish C from U (T).

| Nucleoside | Torsion (atom type)         | n      | $V_n/2$  | $\phi$   |
|------------|-----------------------------|--------|----------|----------|
| A,G        | C8-N9-C1'-H1' (CK-N*-CT-H2) | 3      | 0.5138   | 0.0      |
|            | C8-N9-C1'-C2' (CK-N*-CT-CT) | 1      | 11.5732  | 180.0    |
|            | C8-N9-C1'-O4' (CK-N*-CT-OS) | 1      | 12.0348  | 115.4514 |
|            |                             | 2      | 1.4803   | 355.4794 |
|            |                             | 3      | 0.9597   | 194.7709 |
| C          |                             | 4      | 0.1558   | 100.2963 |
|            | C6-N1-C1'-H1' (CJ-N*-CT-H2) | 3      | 1.44805  | 0.0      |
|            | C6-N1-C1'-C2' (CJ-N*-CT-CT) | 1      | 6.50527  | 180.0    |
|            | C6-N1-C1'-O4' (CJ-N*-CT-OS) | 1      | 7.32714  | 120.0722 |
|            |                             | 2      | 1.71364  | 1.4610   |
| T,U        |                             | 3      | 2.32071  | 185.4723 |
|            |                             | 4      | 0.31543  | 92.78265 |
|            | C6-N1-C1'-H1' (CM-N*-CT-H2) | 3      | 0.71700  | 0.0      |
|            | C6-N1-C1'-C2' (CM-N*-CT-CT) | 1      | 5.1551   | 180.0    |
|            | C6-N1-C1'-O4' (CM-N*-CT-OS) | 1      | 5.7949   | 120.1382 |
|            | 2                           | 1.6720 | 3.0939   |          |
|            | 3                           | 1.2674 | 189.7034 |          |
|            | 4                           | 0.2813 | 111.2030 |          |

**Table S2.** Average structural parameters (last 20 ns of 100 ns simulations) for the A-RNA duplex 2R20' obtained using the ff99bsc0 force field combined with various  $\chi$  corrections (values with ff99 force field in italics). Standard deviations are shown for the unmodified force fields for orientation and they are very similar for the other force fields. RMSD is mass-weighted, for all atoms.

| Parameter                      | X-ray            | No $\chi$ correction                                   | $\chi_{YIL}$          | $\chi_{OL-DFT}^*$     | $\chi_{OL}$           |
|--------------------------------|------------------|--------------------------------------------------------|-----------------------|-----------------------|-----------------------|
| $\chi'^{\circ}$                | 197.1 $\pm$ 4.4  | 202.8 $\pm$ 9.3<br><i>204.8 <math>\pm</math> 13.6</i>  | 196.7<br><i>194.6</i> | 198.3<br><i>196.1</i> | 200.4<br><i>197.7</i> |
| P/ $^{\circ}$                  | 14.1 $\pm$ 6.0   | 18.1 $\pm$ 13.1<br><i>24.8 <math>\pm</math> 23.2</i>   | 16.2<br><i>13.1</i>   | 19.6<br><i>15.8</i>   | 16.9<br><i>14.8</i>   |
| Minor gr. width/ $\text{\AA}$  | 15.4 $\pm$ 0.1   | 16.0 $\pm$ 0.6<br><i>15.5 <math>\pm</math> 0.8</i>     | 15.7<br><i>15.4</i>   | 16.0<br><i>15.7</i>   | 16.0<br><i>15.6</i>   |
| Major gr. width / $\text{\AA}$ | 14.7 $\pm$ 1.5   | 16.1 $\pm$ 2.4<br><i>18.4 <math>\pm</math> 3.0</i>     | 18.1<br><i>20.2</i>   | 17.0<br><i>19.6</i>   | 16.7<br><i>19.4</i>   |
| Slide/ $\text{\AA}$            | -1.70 $\pm$ 0.25 | -1.56 $\pm$ 0.51<br><i>-1.60 <math>\pm</math> 0.57</i> | -1.98<br><i>-2.14</i> | -1.83<br><i>-1.97</i> | -1.73<br><i>-1.98</i> |
| Roll/ $^{\circ}$               | 8.14 $\pm$ 4.09  | 7.82 $\pm$ 6.35<br><i>7.46 <math>\pm</math> 6.46</i>   | 4.75<br><i>4.01</i>   | 6.90<br><i>5.61</i>   | 6.97<br><i>4.93</i>   |
| Propeller/ $^{\circ}$          | -12.5 $\pm$ 4.5  | -14.6 $\pm$ 8.7<br><i>-15.5 <math>\pm</math> 8.9</i>   | -7.0<br><i>-5.7</i>   | -11.5<br><i>-10.2</i> | -11.6<br><i>-10.1</i> |
| X-displ./ $\text{\AA}$         | -4.45 $\pm$ 1.18 | -4.37 $\pm$ 1.81<br><i>-4.46 <math>\pm</math> 2.28</i> | -4.76<br><i>-4.88</i> | -4.87<br><i>-4.87</i> | -4.64<br><i>-5.29</i> |
| Inclination/ $^{\circ}$        | 12.3 $\pm$ 8.3   | 14.9 $\pm$ 12.0<br><i>14.5 <math>\pm</math> 13.1</i>   | 9.1<br><i>7.7</i>     | 13.3<br><i>10.8</i>   | 13.4<br><i>10.0</i>   |
| Helical twist/ $^{\circ}$      | 32.3 $\pm$ 3.6   | 31.2 $\pm$ 4.5<br><i>31.7 <math>\pm</math> 5.7</i>     | 30.2<br><i>30.5</i>   | 30.6<br><i>30.3</i>   | 31.1<br><i>29.4</i>   |
| RMSD/ $\text{\AA}$             |                  | 1.40<br><i>1.62</i>                                    | 1.37<br><i>1.57</i>   | 1.31<br><i>1.41</i>   | 1.36<br><i>1.64</i>   |

\* results for  $\chi_{OL-DFT}$  are average of last 20 ns of a 50 ns trajectory

**Table S3.** Average structural parameters (last 20 ns of 100 ns simulations) for the A-RNA duplex 1RNA obtained using the ff99bsc0 force field combined with various  $\chi$  corrections (values with ff99 force field in italics). Standard deviations are shown for the unmodified force fields for orientation and they are very similar for the other force fields. RMSD is mass-weighted, for all atoms.

| Parameter                      | X-ray            | No $\chi$ correction                                   | $\chi_{YIL}$          | $\chi_{OL-DFT}$       | $\chi_{OL}$           |
|--------------------------------|------------------|--------------------------------------------------------|-----------------------|-----------------------|-----------------------|
| $\chi'^{\circ}$                | 199.3 $\pm$ 9.0  | 213.3 $\pm$ 14.0<br><i>211.2 <math>\pm</math> 12.0</i> | 199.3<br><i>197.2</i> | 203.0<br><i>205.5</i> | 205.6<br><i>207.5</i> |
| P/ $^{\circ}$                  | 18.4 $\pm$ 1.6   | 24.1 $\pm$ 17.2<br><i>25.0 <math>\pm</math> 19.3</i>   | 15.8<br><i>14.4</i>   | 23.0<br><i>32.5</i>   | 19.7<br><i>21.9</i>   |
| Minor gr. width/ $\text{\AA}$  | 16.1 $\pm$ 0.4   | 16.2 $\pm$ 0.8<br><i>15.9 <math>\pm</math> 0.8</i>     | 15.5<br><i>15.2</i>   | 15.8<br><i>15.2</i>   | 15.9<br><i>15.8</i>   |
| Major gr. width / $\text{\AA}$ | 12.3 $\pm$ 1.5   | 15.3 $\pm$ 2.4<br><i>17.1 <math>\pm</math> 2.5</i>     | 15.9<br><i>18.1</i>   | 15.2<br><i>16.7</i>   | 14.8<br><i>16.9</i>   |
| Slide/ $\text{\AA}$            | -1.29 $\pm$ 0.1  | -1.06 $\pm$ 0.59<br><i>-1.29 <math>\pm</math> 0.51</i> | -1.70<br><i>-1.92</i> | -1.49<br><i>-1.59</i> | -1.40<br><i>-1.40</i> |
| Roll/ $^{\circ}$               | 9.96 $\pm$ 5.10  | 14.10 $\pm$ 8.12<br><i>12.07 <math>\pm</math> 6.81</i> | 7.47<br><i>5.69</i>   | 10.69<br><i>8.89</i>  | 11.05<br><i>10.40</i> |
| Propeller/ $^{\circ}$          | -18.8 $\pm$ 2.3  | -11.5 $\pm$ 10.6<br><i>-14.5 <math>\pm</math> 9.4</i>  | -13.4<br><i>-11.5</i> | -15.7<br><i>-15.1</i> | -15.1<br><i>-9.8</i>  |
| X-displ./ $\text{\AA}$         | -4.07 $\pm$ 1.47 | -4.18 $\pm$ 1.83<br><i>-4.19 <math>\pm</math> 1.71</i> | -4.31<br><i>-4.62</i> | -4.27<br><i>-4.35</i> | -4.15<br><i>-4.32</i> |
| Inclination/ $^{\circ}$        | 18.8 $\pm$ 10.8  | 25.8 $\pm$ 14.1<br><i>21.4 <math>\pm</math> 12.0</i>   | 13.2<br><i>10.3</i>   | 18.6<br><i>16.1</i>   | 19.4<br><i>19.1</i>   |
| Helical twist/ $^{\circ}$      | 32.7 $\pm$ 4.1   | 32.3 $\pm$ 6.0<br><i>32.7 <math>\pm</math> 4.7</i>     | 32.0<br><i>31.3</i>   | 33.1<br><i>32.2</i>   | 32.8<br><i>31.6</i>   |
| RMSD/ $\text{\AA}$             |                  | 2.03<br><i>1.96</i>                                    | 1.96<br><i>2.44</i>   | 1.77<br><i>2.32</i>   | 1.70<br><i>2.12</i>   |
